# Supplementary material for: Dual role of the chromatin-binding factor PHF13 in the pre- and post-integration phases of HIV-1 replication
Source: PubMed Central journal article supplement (PMC5666080; doi:10.1098/rsob.170115), 2017-10-11
Supplement: rsob170115supp4.pdf [file rsob170115supp4.pdf]

## Hofmann et al., Fig.S4

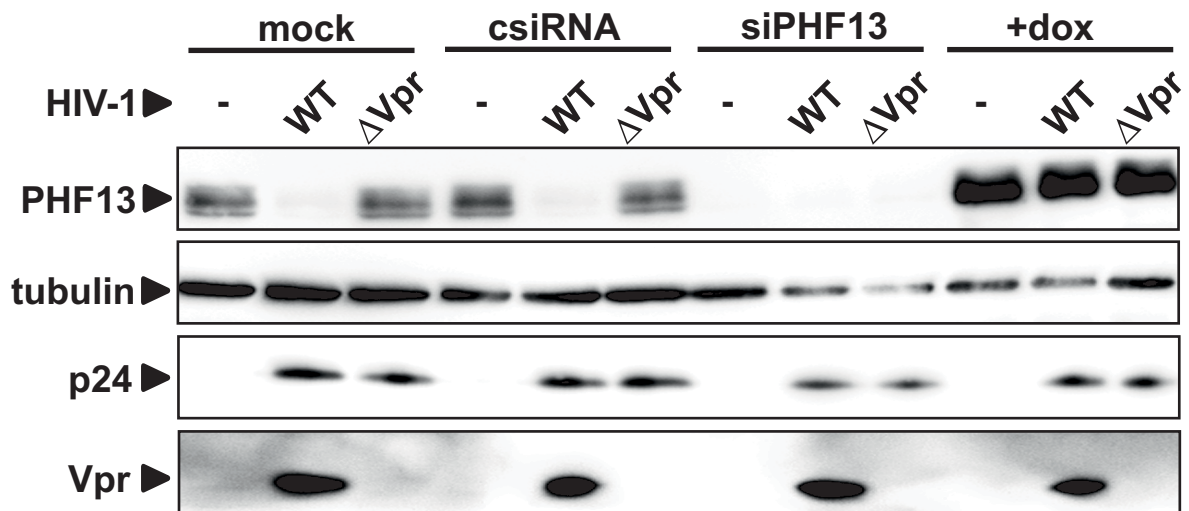

**Figure S4: Analysis of knockdown efficiency in HIV-1-infected U2OS-C5 cells.** U2OS-C5 cells were mock transfected or with a control siRNA (csiRNA) or directed against PHF13 (siPHF13). 24 h later cells were infected with 100 ng p24 VSVG pseudotyped HIV-1 NL4-3 IRES-eGFP or the  $\Delta$ Vpr variant for 6 h, washed and incubated for additional 18 h. At that time point, cells were induced with 1  $\mu$ g/ml doxycycline. 24 h later cells were lysed to detect PHF13, tubulin, HIV-1 p24 and Vpr by immunoblot.
