# Supplementary material for: Dual role of the chromatin-binding factor PHF13 in the pre- and post-integration phases of HIV-1 replication
Source: PubMed Central journal article supplement (PMC5666080; doi:10.1098/rsob.170115), 2017-10-11
Supplement: rsob170115supp5.pdf [file rsob170115supp5.pdf]

## Hofmann et al., Fig.S5

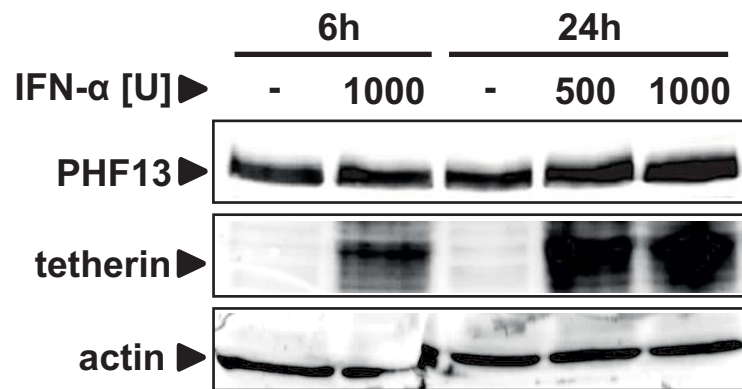

**Figure S5: Effect of Interferon- $\alpha$  on PHF13 expression.** 293T cells were treated with the indicated amounts of recombinant Interferon- $\alpha$  and cultured for 6 h or 24 h. At the time points indicated cells were lysed to detect PHF13, tetherin and actin by immunoblot.
